# Supplementary material for: Electronic properties, optical transparency and transport properties of the p-type transparent conductive oxide family Sn2−xPbxNb2O7 (x = 0, 0.5, 1.0, 1.5, and 2.0): a density functional theory study
Source: Royal Society of Chemistry journal article supplement (doi:10.1039/d4cp03324h), 2024-01-01
Supplement: d4cp03324h1.pdf [file d4cp03324h1.pdf]

Table S1. The calculated mixing enthalpy  $\Delta H_{\text{mix}}$ (eV/Cell) and free energy  $\Delta G_{\text{mix}}$ (eV/Cell) for  $\text{Sn}_{2-x}\text{Pb}_x\text{Nb}_2\text{O}_7$  ( $x=0, 0.5, 1.0, 1.5, 2.0$ ) under 300, 400, 600, 800, 1000 K.

|                         | T(K) | x=0 | x=0.5 | x=1.0 | x=1.5 | x=2.0 |
|-------------------------|------|-----|-------|-------|-------|-------|
| $\Delta H_{\text{mix}}$ | -    | 0   | -0.09 | -0.12 | -0.09 | 0     |
| $\Delta G_{\text{mix}}$ | 300  | 0   | -0.10 | -0.13 | -0.11 | 0     |
|                         | 400  | 0   | -0.11 | -0.14 | -0.11 | 0     |
|                         | 600  | 0   | -0.12 | -0.15 | -0.12 | 0     |
|                         | 800  | 0   | -0.13 | -0.16 | -0.13 | 0     |
|                         | 1000 | 0   | -0.14 | -0.18 | -0.14 | 0     |

Table S2. The calculated branch point energy  $E_{\text{BP}}$ , band edge potential  $E_{\text{NHE}}$ ,  $E_{\text{vac}}$  and ionization energy difference  $\Delta E$  for  $\text{Sn}_{2-x}\text{Pb}_x\text{Nb}_2\text{O}_7$  ( $x=0, 0.5, 1.0, 1.5, 2.0$ ).

|                  | x=0   | x=0.5 | x=1.0 | x=1.5 | x=2.0 |
|------------------|-------|-------|-------|-------|-------|
| $E_{\text{BP}}$  | 0.76  | 0.54  | 0.27  | 0.28  | 0.93  |
| $E_{\text{NHE}}$ | 2.61  | 2.48  | 2.38  | 2.30  | 2.66  |
| $E_{\text{vac}}$ | -7.11 | -6.98 | -6.87 | -6.80 | -7.16 |
| $\Delta E$       | 0.33  | 0.26  | 0.08  | 0.14  | 0.77  |

Table S3. Calculated Mulliken electronegativity of each element in  $\text{Sn}_{2-x}\text{Pb}_x\text{Nb}_2\text{O}_7$  ( $x=0, 0.5, 1.0, 1.5, 2.0$ ).

| element | I(eV) | A(eV) | $\chi$ (eV) |
|---------|-------|-------|-------------|
| Sn      | 7.34  | 1.11  | 4.23        |
| Pb      | 7.42  | 0.36  | 3.89        |
| Nb      | 6.76  | 0.92  | 3.84        |
| O       | 13.62 | 1.46  | 7.54        |

Table S4. The calculated elastic constant  $C_{ij}$ (GPa) and deformation potential constant  $E$ (eV) of  $\text{Sn}_{2-x}\text{Pb}_x\text{Nb}_2\text{O}_7$  ( $x=0, 0.5, 1.0, 1.5, 2.0$ ).

|             | x=0    | x=0.5  | x=1.0  | x=1.5  | x=2.0  |
|-------------|--------|--------|--------|--------|--------|
| $C_{11}$    | 139.06 | 260.23 | 264.91 | 257.76 | 236.09 |
| $C_{44}$    | 66.55  | 74.33  | 90.73  | 75.34  | 88.56  |
| $C_{12}$    | -6.40  | 97.51  | 77.94  | 94.86  | 103.64 |
| $E_{[100]}$ | -      | 6.20   | 1.52   | 16.01  | -      |
| $E_{[010]}$ | -      | 6.20   | 3.01   | 14.34  | -      |
| $E_{[001]}$ | 7.17   | 1.34   | 0.51   | 3.69   | 11.42  |
| $E_{[111]}$ | 2.00   | 1.34   | 1.01   | 0.67   | 8.45   |
